# Supplementary material
Source: ML conference proceedings conference paper supplement (https://openaccess.thecvf.com/content/ICCV2023/html/Fan_Rethinking_Amodal_Video_ICCV_2023_paper.html)
Supplement: Supplementary file 1 [file Fan_Rethinking_Amodal_Video_ICCV_2023_supplemental.zip]

# Supplementary of Rethinking Amodal Video Segmentation from Learning Supervised Signals with Object-centric Representation

## 1. Qualitative comparison between EoRaS and competitors

In the supplementary part, we show some qualitative comparisons of our model and competitors. For more comparisons, we also uploaded a folder with some GIF files comparing the predicted full masks generated by our model EoRaS and the ground truth full masks.

### 1.1. Qualitative comparison in Movi-B and Movi-D

Figure 1 provides a comprehensive qualitative comparison between our EoRaS and competitors across two datasets, Movi-B and Movi-D. The left column displays images from Movi-B, and the right column displays images from Movi-D, with the numbers in the upper-left corner indicating the source frame of each image. For example, 17-3 indicates this image is from the 3<sup>rd</sup> frame of the 17<sup>th</sup> video. Notably, we also highlight the objects with the largest predicted mask difference by framing them for ease of comparison.

When analyzing the images from Movi-B, our model outperforms competitors in many cases. For example, in the first image (17-3), our prediction for the green cylinder is superior to those of our competitors. Specifically, AISFormer predicts a full mask that extends beyond the ground truth, while SaVos predicts an incomplete mask. In the last image (26-11), only our EoRaS model accurately predicts the spout of the teapot.

Examining the Movi-D dataset, we note that AISFormer over-completes the predictions for the objects in the first two images (4-1 and 4-5), while SaVos delivers incomplete masks. Conversely, EoRaS accurately predicts the full masks of the books in the third (34-13) and fourth (34-19) images, while AISFormer and SaVos provide incomplete masks.

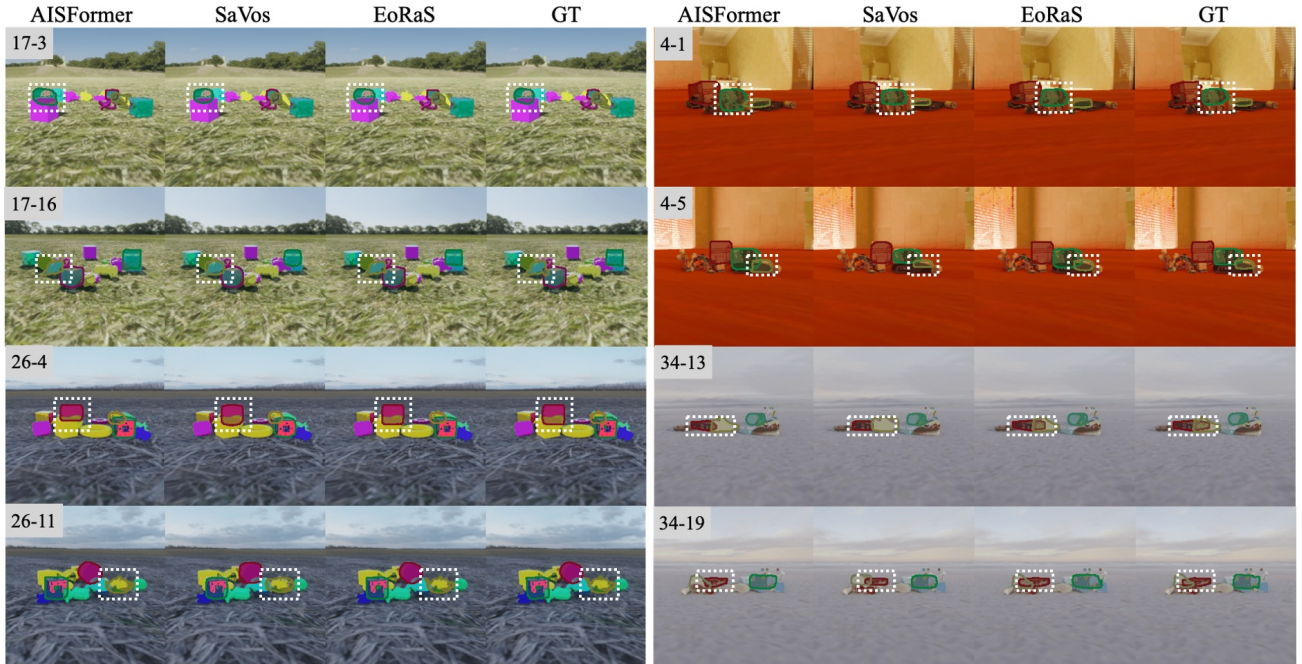

Figure 1: Qualitative comparison between our EoRaS and competitors in the Movi-B and Movi-D datasets. The images in the left column are from Movi-B, and those in the right column are from Movi-D. The numbers in each upper-left corner indicate where these images come from. For example, 17-3 indicates this image is from the 3<sup>rd</sup> frame of the 17<sup>th</sup> video. For convenience, we also put frames on those objects with the largest predicted mask difference.

## 1.2. Qualitative comparison in KITTI

In addition, we showcase the performance of our EoRaS model in the KITTI dataset (Figure 2). Given the sparsely annotated nature of the KITTI dataset, only a few frames have annotations, with no full ground truth masks available for the selected images. Nevertheless, we observe that our model outperforms competitors in certain cases. In the upper-right image (22-160), AISFormer gives a weirdly shaped mask, while SaVos gives an over-completed mask.

To add that, we also noticed that for the cases when there is no occlusion in front of one object, EoRaS can give a more accurate mask than our competitors, as shown in the yellow mask of the lower-right image (22-402), which further shows the robustness of our model.

Overall, the results presented in Figure 1 and Figure 2 suggest that our EoRaS model outperforms competitors in terms of accuracy, completeness, and robustness across various datasets.

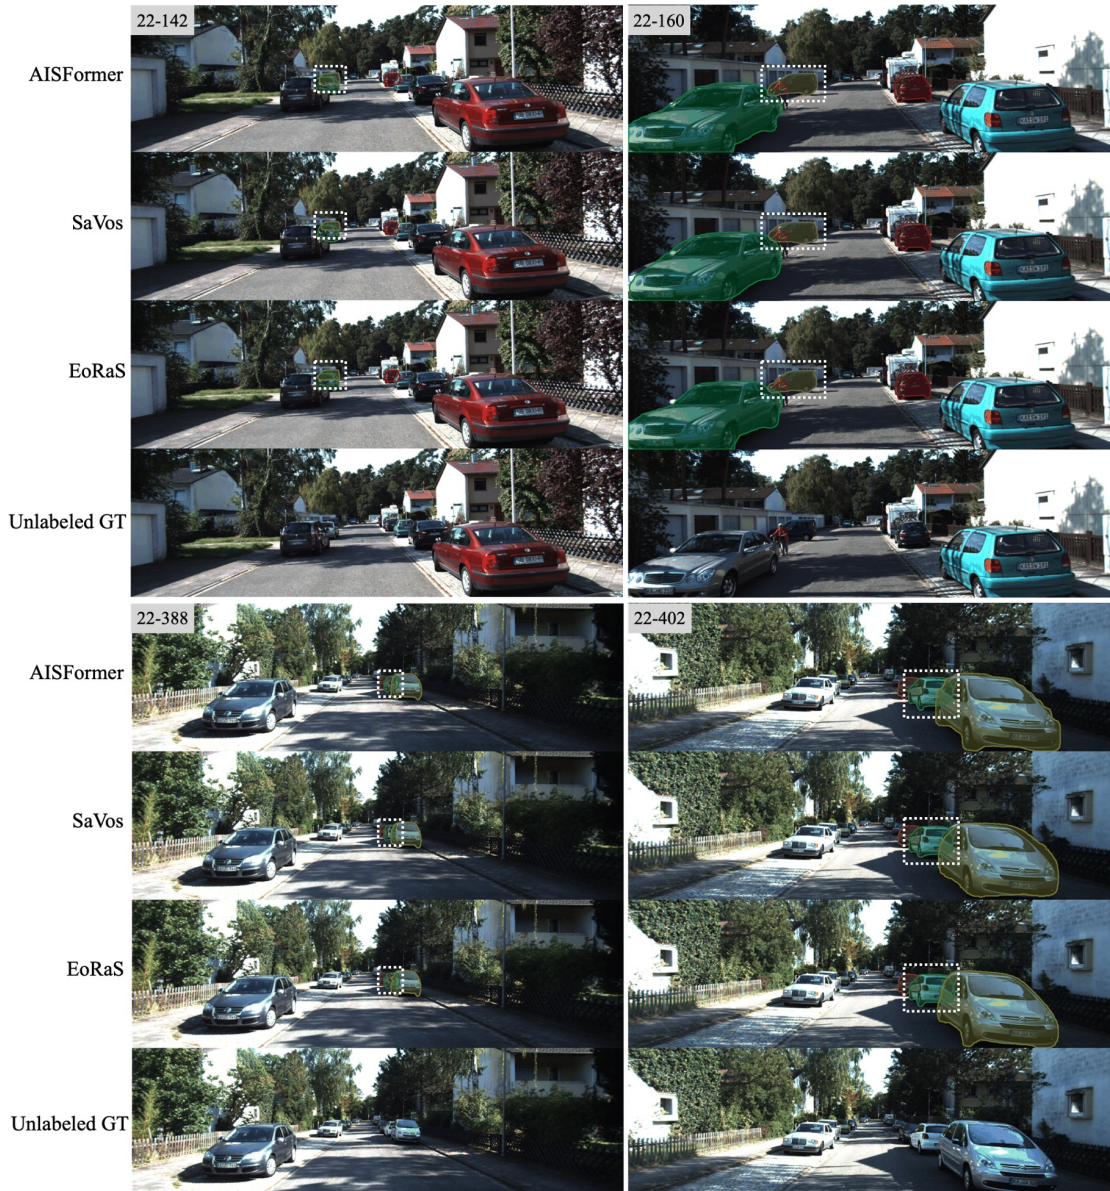

Figure 2: Qualitative comparison between our EoRaS and competitors in the KITTI dataset. The numbers in each upper-left corner indicate where these images come from. For example, 22-142 indicates this image is from the 142<sup>nd</sup> frame of the 22<sup>nd</sup> video. For convenience, we also put frames on those objects with the largest predicted mask difference. Due to the sparse labeling of the KITTI dataset, many images do not have ground-truth full masks.
